# Supplementary material for: Lipid oxidation and protein co-oxidation in ready-to-eat meat products as affected by temperature, antioxidant, and packaging material during 6 months of storage
Source: Royal Society of Chemistry journal article supplement (doi:10.1039/d1ra06872e), 2021-01-01
Supplement: d1ra06872e1.pdf [file d1ra06872e1.pdf]

1 **Supplementary information**

2 Hazrati Wazir<sup>1,2</sup>, Chay Shyan Yea<sup>1</sup>, Nor Afizah Mustapha<sup>4</sup>, Wan Zunairah Wan Ibadullah<sup>1</sup> and Nazamid Saari<sup>1\*</sup>

3

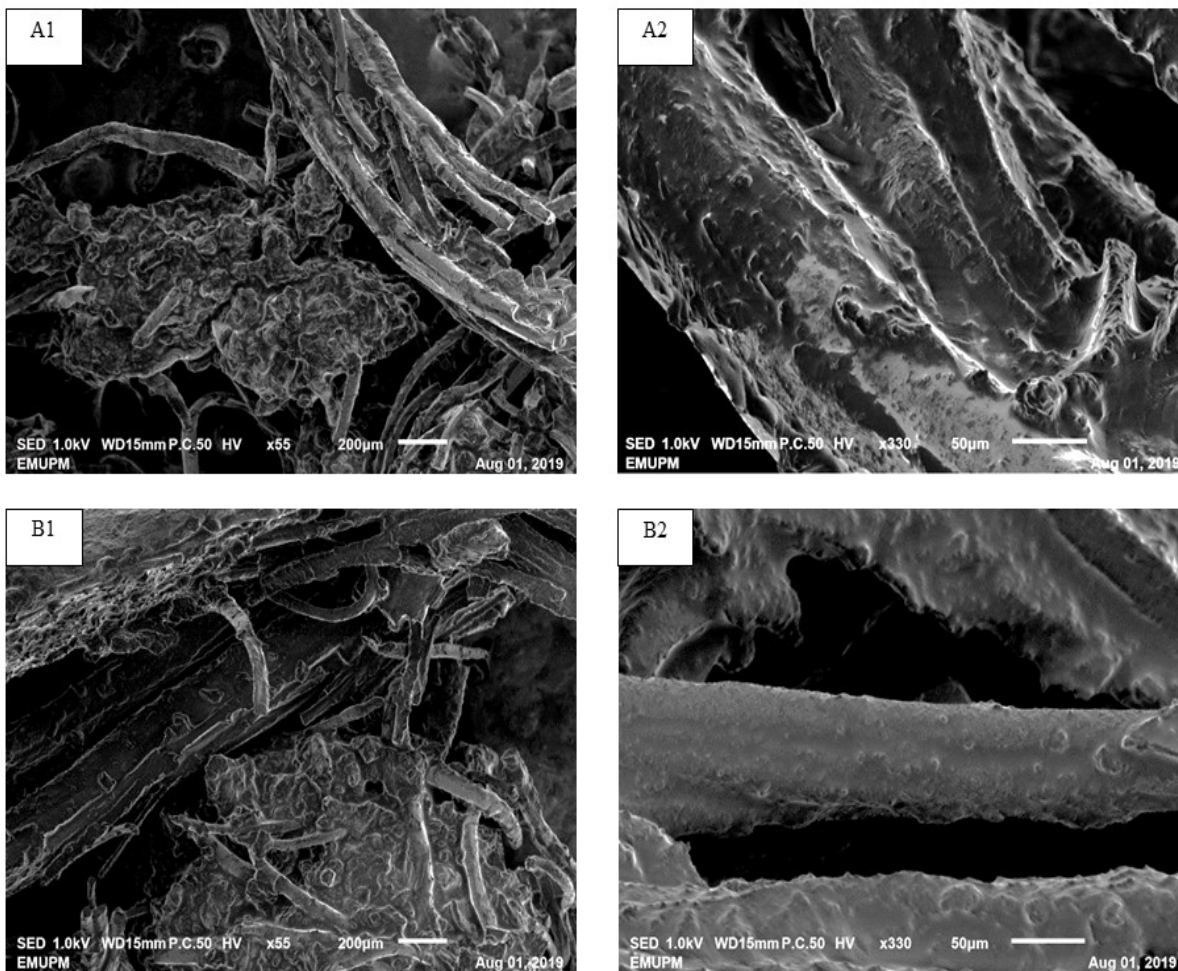

4

5 **Fig. 1.** SEM images of chicken *serunding* (CS) samples: (A1) CS at magnification  $\times 55$ ; (A2) CS at magnification  
6  $\times 330$ ; (B1) CS added with BHA at magnification  $\times 55$ ; (B2) CS added with BHA at magnification  $\times 330$ .

7

9 **Table S1:** General linear model of the colour values (L\*) of the chicken *serunding* incubated at 25, 40 and 60 °C  
 10 in 24 weeks of storage.

**General Linear Model: L\* versus P, MT, Time, DegC**

| Factor | Type  | Levels | Values                                            |
|--------|-------|--------|---------------------------------------------------|
| P      | fixed | 2      | 1, 2                                              |
| MT     | fixed | 2      | 1, 2                                              |
| Time   | fixed | 15     | 0, 1, 2, 3, 4, 5, 6, 7, 8, 10, 12, 14, 16, 20, 24 |
| DegC   | fixed | 3      | 25, 40, 60                                        |

Analysis of Variance for L\*, using Adjusted SS for Tests

| Source       | DF   | Seq SS   | Adj SS   | Adj MS   | F        | P     |
|--------------|------|----------|----------|----------|----------|-------|
| P            | 1    | 45.85    | 45.85    | 45.85    | 88.90    | 0.000 |
| MT           | 1    | 4.71     | 4.71     | 4.71     | 9.13     | 0.003 |
| Time         | 14   | 7615.60  | 7615.60  | 543.97   | 1054.77  | 0.000 |
| DegC         | 2    | 28795.39 | 28795.39 | 14397.69 | 27917.42 | 0.000 |
| P*MT         | 1    | 2.74     | 2.74     | 2.74     | 5.31     | 0.021 |
| P*Time       | 14   | 57.43    | 57.43    | 4.10     | 7.95     | 0.000 |
| P*DegC       | 2    | 6.43     | 6.43     | 3.22     | 6.24     | 0.002 |
| MT*Time      | 14   | 265.81   | 265.81   | 18.99    | 36.81    | 0.000 |
| MT*DegC      | 2    | 108.39   | 108.39   | 54.20    | 105.09   | 0.000 |
| Time*DegC    | 28   | 2816.35  | 2816.35  | 100.58   | 195.03   | 0.000 |
| P*MT*Time    | 14   | 40.36    | 40.36    | 2.88     | 5.59     | 0.000 |
| P*MT*DegC    | 2    | 29.58    | 29.58    | 14.79    | 28.67    | 0.000 |
| MT*Time*DegC | 28   | 251.83   | 251.83   | 8.99     | 17.44    | 0.000 |
| Error        | 2576 | 1328.51  | 1328.51  | 0.52     |          |       |
| Total        | 2699 | 41368.97 |          |          |          |       |

S = 0.718139 R-Sq = 96.79% R-Sq(adj) = 96.64%

11

12

13 **Abbreviations:**

14 P: Packaging type (P1: type A, PET/PE/MPET (High Barrier)/LLDPE or P2: type B, PET/PE/ALU/LLDPE)

15 MT: Samples treatment (1: samples without BHA addition, 2: samples with BHA addition)

16 Time: Storage weeks (0, 1, 2, 3, 4, 5, 6, 7, 8, 10, 12, 14, 16, 20 and 24)

17 DegC: Storage temperature (25, 40 and 60 °C)

18

19 **Table S2:** General linear model of the colour values (a\*) of the chicken *serunding* incubated at 25, 40 and 60 °C  
 20 in 24 weeks of storage.  
 21

**General Linear Model: a\* versus P, MT, Time, DegC**

| Factor | Type  | Levels | Values                                            |
|--------|-------|--------|---------------------------------------------------|
| P      | fixed | 2      | 1, 2                                              |
| MT     | fixed | 2      | 1, 2                                              |
| Time   | fixed | 15     | 0, 1, 2, 3, 4, 5, 6, 7, 8, 10, 12, 14, 16, 20, 24 |
| DegC   | fixed | 3      | 25, 40, 60                                        |

Analysis of Variance for a\*, using Adjusted SS for Tests

| Source       | DF   | Seq SS   | Adj SS   | Adj MS  | F        | P     |
|--------------|------|----------|----------|---------|----------|-------|
| P            | 1    | 8.05     | 8.05     | 8.05    | 50.35    | 0.000 |
| MT           | 1    | 45.89    | 45.89    | 45.89   | 286.87   | 0.000 |
| Time         | 14   | 3186.34  | 3186.34  | 227.60  | 1422.69  | 0.000 |
| DegC         | 2    | 12533.48 | 12533.48 | 6266.74 | 39173.06 | 0.000 |
| P*MT         | 1    | 2.12     | 2.12     | 2.12    | 13.25    | 0.000 |
| P*Time       | 14   | 49.38    | 49.38    | 3.53    | 22.05    | 0.000 |
| P*DegC       | 2    | 4.11     | 4.11     | 2.06    | 12.85    | 0.000 |
| MT*Time      | 14   | 132.26   | 132.26   | 9.45    | 59.05    | 0.000 |
| MT*DegC      | 2    | 40.52    | 40.52    | 20.26   | 126.64   | 0.000 |
| Time*DegC    | 28   | 1447.74  | 1447.74  | 51.71   | 323.21   | 0.000 |
| P*MT*Time    | 14   | 17.87    | 17.87    | 1.28    | 7.98     | 0.000 |
| P*MT*DegC    | 2    | 1.53     | 1.53     | 0.76    | 4.78     | 0.008 |
| MT*Time*DegC | 28   | 75.77    | 75.77    | 2.71    | 16.92    | 0.000 |
| Error        | 2576 | 412.10   | 412.10   | 0.16    |          |       |
| Total        | 2699 | 17957.16 |          |         |          |       |

S = 0.399970 R-Sq = 97.71% R-Sq(adj) = 97.60%

22

23 **Abbreviations:**

24 P: Packaging type (P1: type A, PET/PE/MPET (High Barrier)/LLDPE or P2: type B, PET/PE/ALU/LLDPE)

25 MT: Samples treatment (1: samples without BHA addition, 2: samples with BHA addition)

26 Time: Storage weeks (0, 1, 2, 3, 4, 5, 6, 7, 8, 10, 12, 14, 16, 20 and 24)

27 DegC: Storage temperature (25, 40 and 60 °C)

28

29

30

31

32

33

34

35

36 **Table S3:** General linear model of the colour values (b\*) of the chicken *serunding* incubated at 25, 40 and 60°C  
 37 in 24 weeks of storage.  
 38

**General Linear Model: b\* versus P, MT, Time, DegC**

| Factor | Type  | Levels | Values                                            |
|--------|-------|--------|---------------------------------------------------|
| P      | fixed | 2      | 1, 2                                              |
| MT     | fixed | 2      | 1, 2                                              |
| Time   | fixed | 15     | 0, 1, 2, 3, 4, 5, 6, 7, 8, 10, 12, 14, 16, 20, 24 |
| DegC   | fixed | 3      | 25, 40, 60                                        |

Analysis of Variance for b\*, using Adjusted SS for Tests

| Source       | DF   | Seq SS   | Adj SS   | Adj MS   | F        | P     |
|--------------|------|----------|----------|----------|----------|-------|
| P            | 1    | 32.15    | 32.15    | 32.15    | 119.00   | 0.000 |
| MT           | 1    | 1.56     | 1.56     | 1.56     | 5.76     | 0.016 |
| Time         | 14   | 8108.73  | 8108.73  | 579.20   | 2143.85  | 0.000 |
| DegC         | 2    | 40416.21 | 40416.21 | 20208.11 | 74798.98 | 0.000 |
| P*MT         | 1    | 1.80     | 1.80     | 1.80     | 6.65     | 0.010 |
| P*Time       | 14   | 90.35    | 90.35    | 6.45     | 23.89    | 0.000 |
| P*DegC       | 2    | 8.99     | 8.99     | 4.49     | 16.63    | 0.000 |
| MT*Time      | 14   | 677.84   | 677.84   | 48.42    | 179.21   | 0.000 |
| MT*DegC      | 2    | 263.71   | 263.71   | 131.85   | 488.04   | 0.000 |
| Time*DegC    | 28   | 4408.59  | 4408.59  | 157.45   | 582.79   | 0.000 |
| P*MT*Time    | 14   | 108.48   | 108.48   | 7.75     | 28.68    | 0.000 |
| P*MT*DegC    | 2    | 1.59     | 1.59     | 0.80     | 2.95     | 0.053 |
| MT*Time*DegC | 28   | 382.06   | 382.06   | 13.64    | 50.51    | 0.000 |
| Error        | 2576 | 695.95   | 695.95   | 0.27     |          |       |
| Total        | 2699 | 55197.99 |          |          |          |       |

S = 0.519774 R-Sq = 98.74% R-Sq(adj) = 98.68%

39

40 **Abbreviations:**

41 P: Packaging type (P1: type A, PET/PE/MPET (High Barrier)/LLDPE or P2: type B, PET/PE/ALU/LLDPE)  
 42 MT: Samples treatment (1: samples without BHA addition, 2: samples with BHA addition) Time: Storage weeks  
 43 (0, 1, 2, 3, 4, 5, 6, 7, 8, 10, 12, 14, 16, 20 and 24)  
 44 DegC: Storage temperature (25, 40 and 60 °C)  
 45

46

47 **Table S4:** General linear model of the total colour difference ( $\Delta E_{0-24}$ ) of the effect of antioxidant addition in the  
 48 chicken *serunding* incubated at 25, 40 and 60 °C in 24 weeks of storage.  
 49

**General Linear Model: Colour Difference versus Packaging, Treatment, ...**

| Factor      | Type  | Levels | Values     |
|-------------|-------|--------|------------|
| Packaging   | fixed | 2      | 1, 2       |
| Treatment   | fixed | 2      | 1, 2       |
| Temperature | fixed | 3      | 25, 40, 60 |

Analysis of Variance for Colour Difference, using Adjusted SS for Tests

| Source                          | DF  | Seq SS  | Adj SS  | Adj MS  | F        |
|---------------------------------|-----|---------|---------|---------|----------|
| Packaging                       | 1   | 0.94    | 0.94    | 0.94    | 3.83     |
| Treatment                       | 1   | 94.78   | 94.78   | 94.78   | 383.91   |
| Temperature                     | 2   | 6914.78 | 6914.78 | 3457.39 | 14004.67 |
| Packaging*Treatment             | 1   | 0.46    | 0.46    | 0.46    | 1.88     |
| Packaging*Temperature           | 2   | 1.99    | 1.99    | 1.00    | 4.03     |
| Treatment*Temperature           | 2   | 1.84    | 1.84    | 0.92    | 3.73     |
| Packaging*Treatment*Temperature | 2   | 1.05    | 1.05    | 0.53    | 2.13     |
| Error                           | 168 | 41.47   | 41.47   | 0.25    |          |
| Total                           | 179 | 7057.33 |         |         |          |

| Source                          | P     |
|---------------------------------|-------|
| Packaging                       | 0.052 |
| Treatment                       | 0.000 |
| Temperature                     | 0.000 |
| Packaging*Treatment             | 0.172 |
| Packaging*Temperature           | 0.019 |
| Treatment*Temperature           | 0.026 |
| Packaging*Treatment*Temperature | 0.122 |
| Error                           |       |
| Total                           |       |

50

S = 0.496864 R-Sq = 99.41% R-Sq(adj) = 99.37%

51

| Packaging | Treatment | Temperature | N  | Mean   | Grouping |
|-----------|-----------|-------------|----|--------|----------|
| 1         | 2         | 60          | 15 | 19.066 | A        |
| 2         | 2         | 60          | 15 | 18.906 | A        |
| 2         | 1         | 60          | 15 | 17.568 | B        |
| 1         | 1         | 60          | 15 | 17.214 | B        |
| 2         | 2         | 40          | 15 | 10.967 | C        |
| 1         | 2         | 40          | 15 | 10.698 | C        |
| 2         | 1         | 40          | 15 | 9.527  | D        |
| 1         | 1         | 40          | 15 | 8.950  | D        |
| 2         | 2         | 25          | 15 | 3.614  | E        |
| 1         | 2         | 25          | 15 | 3.593  | E        |
| 1         | 1         | 25          | 15 | 2.534  | F        |
| 2         | 1         | 25          | 15 | 2.342  | F        |

Means that do not share a letter are significantly different.

52

**53 Abbreviations:**

54 Packaging: (P1: type A, PET/PE/MPET (High Barrier)/LLDPE or P2: type B, PET/PE/ALU/LLDPE)

55 Treatment: Samples treatment (1: samples without antioxidant, 2: samples with antioxidant addition)

56 Temperature: Storage temperature (25, 40 and 60 °C)

57

58 **Table S5:** General linear model of the total colour difference ( $\Delta E_{0-24}$ ) of the different packaging materials used  
 59 to pack chicken *serunding* incubated at -80 and 25 °C in 24 weeks of storage.  
 60

**General Linear Model: Dcolour versus Cp, T, DegC**

| Factor | Type  | Levels | Values  |
|--------|-------|--------|---------|
| Cp     | fixed | 3      | 1, 2, 3 |
| T      | fixed | 2      | 1, 2    |
| DegC   | fixed | 2      | -80, 25 |

Analysis of Variance for Dcolour, using Adjusted SS for Tests

| Source    | DF  | Seq SS  | Adj SS  | Adj MS  | F      | P     |
|-----------|-----|---------|---------|---------|--------|-------|
| Cp        | 2   | 41.114  | 41.114  | 20.557  | 111.34 | 0.000 |
| T         | 1   | 0.681   | 0.681   | 0.681   | 3.69   | 0.057 |
| DegC      | 1   | 180.830 | 180.830 | 180.830 | 979.43 | 0.000 |
| Cp*T      | 2   | 4.072   | 4.072   | 2.036   | 11.03  | 0.000 |
| Cp*DegC   | 2   | 6.607   | 6.607   | 3.304   | 17.89  | 0.000 |
| T*DegC    | 1   | 4.163   | 4.163   | 4.163   | 22.55  | 0.000 |
| Cp*T*DegC | 2   | 8.650   | 8.650   | 4.325   | 23.42  | 0.000 |
| Error     | 108 | 19.940  | 19.940  | 0.185   |        |       |
| Total     | 119 | 266.057 |         |         |        |       |

S = 0.429684 R-Sq = 92.51% R-Sq(adj) = 91.74%

61

| Cp | T | DegC | N  | Mean   | Grouping |
|----|---|------|----|--------|----------|
| 3  | 1 | 25   | 10 | 5.0900 | A        |
| 3  | 2 | 25   | 10 | 4.3369 | B        |
| 1  | 2 | 25   | 10 | 3.5731 | C        |
| 2  | 2 | 25   | 10 | 3.5383 | C        |
| 1  | 1 | 25   | 10 | 2.4398 | D        |
| 2  | 1 | 25   | 10 | 2.3489 | D        |
| 3  | 2 | -80  | 10 | 1.6020 | E        |
| 3  | 1 | -80  | 10 | 1.5873 | E        |
| 2  | 1 | -80  | 10 | 1.0384 | E F      |
| 1  | 1 | -80  | 10 | 1.0051 | E F      |
| 1  | 2 | -80  | 10 | 0.7526 | F        |
| 2  | 2 | -80  | 10 | 0.6108 | F        |

Means that do not share a letter are significantly different.

62

63

**64 Abbreviations:**

65 Cp: Control packaging

66 Cp1: Metallized packaging type A, PET/PE/MPET (High Barrier)/LLDPE

67 Cp2: Metallized packaging type B, PET/PE/ALU/LLDPE

68 Cp3: Control clear packaging

69 DegC: Storage temperature of -80 and 25 °C

70 T: Different samples treatment (T1: samples without BHA addition and T2: samples with BHA addition)

71 **Table S6:** General linear model of the lipid extraction of the chicken *serunding* incubated at 25, 40 and 60°C in  
 72 24 weeks of storage.

**General Linear Model: LE versus Pack, MT, Time, Temp**

| Factor | Type  | Levels | Values                                            |
|--------|-------|--------|---------------------------------------------------|
| Pack   | fixed | 2      | 1, 2                                              |
| MT     | fixed | 2      | 1, 2                                              |
| Time   | fixed | 15     | 0, 1, 2, 3, 4, 5, 6, 7, 8, 10, 12, 14, 16, 20, 24 |
| Temp   | fixed | 3      | 25, 40, 60                                        |

|  
 Analysis of Variance for LE, using Adjusted SS for Tests

| Source       | DF  | Seq SS   | Adj SS   | Adj MS  | F      | P     |
|--------------|-----|----------|----------|---------|--------|-------|
| Pack         | 1   | 37.335   | 37.335   | 37.335  | 43.19  | 0.000 |
| MT           | 1   | 249.546  | 249.546  | 249.546 | 288.71 | 0.000 |
| Time         | 14  | 3481.532 | 3481.532 | 248.681 | 287.70 | 0.000 |
| Temp         | 2   | 852.300  | 852.300  | 426.150 | 493.02 | 0.000 |
| Pack*MT      | 1   | 13.120   | 13.120   | 13.120  | 15.18  | 0.000 |
| Pack*Time    | 14  | 148.971  | 148.971  | 10.641  | 12.31  | 0.000 |
| Pack*Temp    | 2   | 25.377   | 25.377   | 12.688  | 14.68  | 0.000 |
| MT*Time      | 14  | 149.857  | 149.857  | 10.704  | 12.38  | 0.000 |
| MT*Temp      | 2   | 13.677   | 13.677   | 6.838   | 7.91   | 0.000 |
| Time*Temp    | 28  | 283.167  | 283.167  | 10.113  | 11.70  | 0.000 |
| Pack*MT*Time | 14  | 69.233   | 69.233   | 4.945   | 5.72   | 0.000 |
| Pack*MT*Temp | 2   | 6.691    | 6.691    | 3.346   | 3.87   | 0.022 |
| MT*Time*Temp | 28  | 122.207  | 122.207  | 4.365   | 5.05   | 0.000 |
| Error        | 416 | 359.575  | 359.575  | 0.864   |        |       |
| Total        | 539 | 5812.588 |          |         |        |       |

S = 0.929711 R-Sq = 93.81% R-Sq(adj) = 91.98%

73

74 **Abbreviations:**

75 Pack: Packaging type (P1: type A, PET/PE/MPET (High Barrier)/LLDPE or P2: type B, PET/PE/ALU/LLDPE)

76 MT: Samples treatment (1: samples without BHA addition, 2: samples with BHA addition) Time: Storage weeks  
 77 (0, 1, 2, 3, 4, 5, 6, 7, 8, 10, 12, 14, 16, 20 and 24)

78 Temp: Storage temperature (25, 40 and 60 °C)

79

80

81

82

83

84 **Table S7:** General linear model of the conjugated dienes (CD) of the chicken *serunding* incubated at 25, 40 and  
 85 60°C in 24 weeks of storage.

**General Linear Model: CD versus Pack, MT, Time, Temp**

| Factor | Type  | Levels | Values                                            |
|--------|-------|--------|---------------------------------------------------|
| Pack   | fixed | 2      | 1, 2                                              |
| MT     | fixed | 2      | 1, 2                                              |
| Time   | fixed | 15     | 0, 1, 2, 3, 4, 5, 6, 7, 8, 10, 12, 14, 16, 20, 24 |
| Temp   | fixed | 3      | 25, 40, 60                                        |

Analysis of Variance for CD, using Adjusted SS for Tests

| Source       | DF  | Seq SS   | Adj SS   | Adj MS   | F      | P     |
|--------------|-----|----------|----------|----------|--------|-------|
| Pack         | 1   | 132.1364 | 132.1364 | 132.1364 | 599.71 | 0.000 |
| MT           | 1   | 0.7652   | 0.7652   | 0.7652   | 3.47   | 0.063 |
| Time         | 14  | 29.0974  | 29.0974  | 2.0784   | 9.43   | 0.000 |
| Temp         | 2   | 22.3176  | 22.3176  | 11.1588  | 50.65  | 0.000 |
| Pack*MT      | 1   | 52.4431  | 52.4431  | 52.4431  | 238.02 | 0.000 |
| Pack*Time    | 14  | 7.0730   | 7.0730   | 0.5052   | 2.29   | 0.005 |
| Pack*Temp    | 2   | 2.8568   | 2.8568   | 1.4284   | 6.48   | 0.002 |
| MT*Time      | 14  | 9.2132   | 9.2132   | 0.6581   | 2.99   | 0.000 |
| MT*Temp      | 2   | 8.5381   | 8.5381   | 4.2691   | 19.38  | 0.000 |
| Time*Temp    | 28  | 21.2924  | 21.2924  | 0.7604   | 3.45   | 0.000 |
| Pack*MT*Time | 14  | 2.9733   | 2.9733   | 0.2124   | 0.96   | 0.490 |
| Pack*MT*Temp | 2   | 1.2972   | 1.2972   | 0.6486   | 2.94   | 0.054 |
| MT*Time*Temp | 28  | 11.8856  | 11.8856  | 0.4245   | 1.93   | 0.004 |
| Error        | 416 | 91.6588  | 91.6588  | 0.2203   |        |       |
| Total        | 539 | 393.5481 |          |          |        |       |

S = 0.469397 R-Sq = 76.71% R-Sq(adj) = 69.82%

86

87 **Abbreviations:**

88 Pack: Packaging type (P1: type A, PET/PE/MPET (High Barrier)/LLDPE or P2: type B, PET/PE/ALU/LLDPE)

89 MT: Samples treatment (1: samples without BHA addition, 2: samples with BHA addition) Time: Storage weeks  
 90 (0, 1, 2, 3, 4, 5, 6, 7, 8, 10, 12, 14, 16, 20 and 24)

91 Temp: Storage temperature (25, 40 and 60 °C)

92

93



94 **Table S8:** General linear model of the malondialdehydes (TBARS) of the chicken *serunding* incubated at 25, 40  
 95 and 60°C in 24 weeks of storage.  
 96

**General Linear Model: TBARS versus Pack, MT, Time, Temp**

| Factor | Type  | Levels | Values                                            |
|--------|-------|--------|---------------------------------------------------|
| Pack   | fixed | 2      | 1, 2                                              |
| MT     | fixed | 2      | 1, 2                                              |
| Time   | fixed | 15     | 0, 1, 2, 3, 4, 5, 6, 7, 8, 10, 12, 14, 16, 20, 24 |
| Temp   | fixed | 3      | 25, 40, 60                                        |

Analysis of Variance for TBARS, using Adjusted SS for Tests

| Source       | DF  | Seq SS   | Adj SS   | Adj MS   | F        | P     |
|--------------|-----|----------|----------|----------|----------|-------|
| Pack         | 1   | 8.4337   | 8.4337   | 8.4337   | 513.21   | 0.000 |
| MT           | 1   | 2.8979   | 2.8979   | 2.8979   | 176.34   | 0.000 |
| Time         | 14  | 153.6545 | 153.6545 | 10.9753  | 667.88   | 0.000 |
| Temp         | 2   | 446.4204 | 446.4204 | 223.2102 | 13582.94 | 0.000 |
| Pack*MT      | 1   | 0.9013   | 0.9013   | 0.9013   | 54.85    | 0.000 |
| Pack*Time    | 14  | 1.9717   | 1.9717   | 0.1408   | 8.57     | 0.000 |
| Pack*Temp    | 2   | 1.6833   | 1.6833   | 0.8416   | 51.22    | 0.000 |
| MT*Time      | 14  | 0.8620   | 0.8620   | 0.0616   | 3.75     | 0.000 |
| MT*Temp      | 2   | 0.8705   | 0.8705   | 0.4353   | 26.49    | 0.000 |
| Time*Temp    | 28  | 86.9034  | 86.9034  | 3.1037   | 188.87   | 0.000 |
| Pack*MT*Time | 14  | 0.6078   | 0.6078   | 0.0434   | 2.64     | 0.001 |
| Pack*MT*Temp | 2   | 0.5042   | 0.5042   | 0.2521   | 15.34    | 0.000 |
| MT*Time*Temp | 28  | 1.7531   | 1.7531   | 0.0626   | 3.81     | 0.000 |
| Error        | 416 | 6.8362   | 6.8362   | 0.0164   |          |       |
| Total        | 539 | 714.2999 |          |          |          |       |

S = 0.128192 R-Sq = 99.04% R-Sq(adj) = 98.76%

97

**98 Abbreviations:**

99 Pack: Packaging type (P1: type A, PET/PE/MPET (High Barrier)/LLDPE or P2: type B, PET/PE/ALU/LLDPE)  
 100 MT: Samples treatment (1: samples without BHA addition, 2: samples with BHA addition) Time: Storage weeks  
 101 (0, 1, 2, 3, 4, 5, 6, 7, 8, 10, 12, 14, 16, 20 and 24)  
 102 Temp: Storage temperature (25, 40 and 60 °C)  
 103  
 104

105 **Table S9:** General linear model of the protein solubility (PS) of the chicken *serunding* incubated at 25, 40 and  
 106 60°C in 24 weeks of storage.  
 107

**General Linear Model: PS versus Pack, MT, Time, Temp**

| Factor | Type  | Levels | Values                                            |
|--------|-------|--------|---------------------------------------------------|
| Pack   | fixed | 2      | 1, 2                                              |
| MT     | fixed | 2      | 1, 2                                              |
| Time   | fixed | 15     | 0, 1, 2, 3, 4, 5, 6, 7, 8, 10, 12, 14, 16, 20, 24 |
| Temp   | fixed | 3      | 25, 40, 60                                        |

Analysis of Variance for PS, using Adjusted SS for Tests

| Source       | DF  | Seq SS   | Adj SS   | Adj MS   | F       | P     |
|--------------|-----|----------|----------|----------|---------|-------|
| Pack         | 1   | 1019.40  | 1019.40  | 1019.40  | 330.03  | 0.000 |
| MT           | 1   | 111.40   | 111.40   | 111.40   | 36.07   | 0.000 |
| Time         | 14  | 7568.09  | 7568.09  | 540.58   | 175.01  | 0.000 |
| Temp         | 2   | 25931.20 | 25931.20 | 12965.60 | 4197.60 | 0.000 |
| Pack*MT      | 1   | 26.07    | 26.07    | 26.07    | 8.44    | 0.004 |
| Pack*Time    | 14  | 444.78   | 444.78   | 31.77    | 10.29   | 0.000 |
| Pack*Temp    | 2   | 99.03    | 99.03    | 49.51    | 16.03   | 0.000 |
| MT*Time      | 14  | 135.46   | 135.46   | 9.68     | 3.13    | 0.000 |
| MT*Temp      | 2   | 44.19    | 44.19    | 22.09    | 7.15    | 0.001 |
| Time*Temp    | 28  | 3271.70  | 3271.70  | 116.85   | 37.83   | 0.000 |
| Pack*MT*Time | 14  | 110.29   | 110.29   | 7.88     | 2.55    | 0.002 |
| Pack*MT*Temp | 2   | 21.89    | 21.89    | 10.94    | 3.54    | 0.030 |
| MT*Time*Temp | 28  | 156.26   | 156.26   | 5.58     | 1.81    | 0.008 |
| Error        | 416 | 1284.95  | 1284.95  | 3.09     |         |       |
| Total        | 539 | 40224.70 |          |          |         |       |

S = 1.75750 R-Sq = 96.81% R-Sq(adj) = 95.86%

108

**109 Abbreviations:**

110 Pack: Packaging type (P1: type A, PET/PE/MPET (High Barrier)/LLDPE or P2: type B, PET/PE/ALU/LLDPE)  
 111 MT: Samples treatment (1: samples without BHA addition, 2: samples with BHA addition) Time: Storage weeks  
 112 (0, 1, 2, 3, 4, 5, 6, 7, 8, 10, 12, 14, 16, 20 and 24)  
 113 Temp: Storage temperature (25, 40 and 60 °C)

114

115

116 **Table S10:** General linear model of the tryptophan content (TC) of the chicken *serunding* incubated at 25, 40 and  
 117 60°C in 24 weeks of storage.  
 118

**General Linear Model: TC versus Pack, BHA, Week, T**

| Factor | Type  | Levels | Values                  |
|--------|-------|--------|-------------------------|
| Pack   | fixed | 2      | 1, 2                    |
| BHA    | fixed | 2      | 1, 2                    |
| Week   | fixed | 7      | 0, 4, 8, 12, 16, 20, 24 |
| T      | fixed | 3      | 25, 40, 60              |

Analysis of Variance for TC, using Adjusted SS for Tests

| Source        | DF  | Seq SS   | Adj SS   | Adj MS  | F      | P     |
|---------------|-----|----------|----------|---------|--------|-------|
| Pack          | 1   | 21156.7  | 21156.7  | 21156.7 | 226.15 | 0.000 |
| BHA           | 1   | 23.5     | 23.5     | 23.5    | 0.25   | 0.617 |
| Week          | 6   | 321309.6 | 321309.6 | 53551.6 | 572.42 | 0.000 |
| T             | 2   | 3496.5   | 3496.5   | 1748.3  | 18.69  | 0.000 |
| Pack*BHA      | 1   | 988.1    | 988.1    | 988.1   | 10.56  | 0.001 |
| Pack*Week     | 6   | 27998.2  | 27998.2  | 4666.4  | 49.88  | 0.000 |
| Pack*T        | 2   | 1090.5   | 1090.5   | 545.3   | 5.83   | 0.004 |
| BHA*Week      | 6   | 1269.8   | 1269.8   | 211.6   | 2.26   | 0.040 |
| BHA*T         | 2   | 2067.7   | 2067.7   | 1033.9  | 11.05  | 0.000 |
| Week*T        | 12  | 12347.6  | 12347.6  | 1029.0  | 11.00  | 0.000 |
| Pack*BHA*Week | 6   | 3050.3   | 3050.3   | 508.4   | 5.43   | 0.000 |
| Pack*BHA*T    | 2   | 2394.2   | 2394.2   | 1197.1  | 12.80  | 0.000 |
| Pack*Week*T   | 12  | 9526.2   | 9526.2   | 793.8   | 8.49   | 0.000 |
| BHA*Week*T    | 12  | 1559.6   | 1559.6   | 130.0   | 1.39   | 0.174 |
| Error         | 180 | 16839.6  | 16839.6  | 93.6    |        |       |
| Total         | 251 | 425118.1 |          |         |        |       |

119

S = 9.67231 R-Sq = 96.04% R-Sq(adj) = 94.48%

120

**121 Abbreviations:**

122 Pack: Packaging type (P1: type A, PET/PE/MPET (High Barrier)/LLDPE or P2: type B, PET/PE/ALU/LLDPE)

123 BHA: Samples treatment (1: samples without BHA addition, 2: samples with BHA addition)

124 Week: Storage weeks (0, 1, 2, 3, 4, 5, 6, 7, 8, 10, 12, 14, 16, 20 and 24)

125 T: Storage temperature (25, 40 and 60 °C)

126

127

128

129

130

131

132

133

134 **Table S11:** General linear model of the protein carbonyl (PC) of the chicken *serunding* incubated at 25, 40 and  
 135 60°C in 24 weeks of storage.  
 136

**General Linear Model: PC versus MT, P, Week, T**

| Factor | Type  | Levels | Values                     |
|--------|-------|--------|----------------------------|
| MT     | fixed | 2      | 1, 2                       |
| P      | fixed | 2      | 1, 2                       |
| Week   | fixed | 8      | 0, 1, 4, 8, 12, 16, 20, 24 |
| T      | fixed | 3      | 25, 40, 60                 |

Analysis of Variance for PC, using Adjusted SS for Tests

| Source    | DF  | Seq SS   | Adj SS   | Adj MS  | F      | P     |
|-----------|-----|----------|----------|---------|--------|-------|
| MT        | 1   | 200.51   | 200.51   | 200.51  | 31.26  | 0.000 |
| P         | 1   | 79.88    | 79.88    | 79.88   | 12.45  | 0.001 |
| Week      | 7   | 6472.08  | 6472.08  | 924.58  | 144.15 | 0.000 |
| T         | 2   | 11688.08 | 11688.08 | 5844.04 | 911.10 | 0.000 |
| MT*P      | 1   | 4.02     | 4.02     | 4.02    | 0.63   | 0.430 |
| MT*Week   | 7   | 255.87   | 255.87   | 36.55   | 5.70   | 0.000 |
| MT*T      | 2   | 204.17   | 204.17   | 102.08  | 15.92  | 0.000 |
| P*Week    | 7   | 50.84    | 50.84    | 7.26    | 1.13   | 0.347 |
| P*T       | 2   | 2.58     | 2.58     | 1.29    | 0.20   | 0.818 |
| Week*T    | 14  | 5854.72  | 5854.72  | 418.19  | 65.20  | 0.000 |
| MT*P*Week | 7   | 166.38   | 166.38   | 23.77   | 3.71   | 0.001 |
| MT*P*T    | 2   | 12.44    | 12.44    | 6.22    | 0.97   | 0.382 |
| P*Week*T  | 14  | 89.59    | 89.59    | 6.40    | 1.00   | 0.460 |
| Error     | 124 | 795.37   | 795.37   | 6.41    |        |       |
| Total     | 191 | 25876.52 |          |         |        |       |

|  
 S = 2.53264 R-Sq = 96.93% R-Sq(adj) = 95.27%

137

138 **Abbreviations:**

139 P: Packaging type (P1: type A, PET/PE/MPET (High Barrier)/LLDPE or P2: type B, PET/PE/ALU/LLDPE)

140 MT: Samples treatment (1: samples without BHA addition, 2: samples with BHA addition)

141 Week: Storage weeks (0, 1, 2, 3, 4, 5, 6, 7, 8, 10, 12, 14, 16, 20 and 24)

142 T: Storage temperature (25, 40 and 60 °C)

143 **Table 12:** General linear model of the Schiff base (SB) of the chicken *serunding* incubated at 25, 40 and 60°C in  
 144 24 weeks of storage

145

**General Linear Model: SB versus Pack, BHA, Week, T**

| Factor | Type  | Levels | Values                  |
|--------|-------|--------|-------------------------|
| Pack   | fixed | 2      | 1, 2                    |
| BHA    | fixed | 2      | 1, 2                    |
| Week   | fixed | 7      | 0, 4, 8, 12, 16, 20, 24 |
| T      | fixed | 3      | 25, 40, 60              |

Analysis of Variance for SB, using Adjusted SS for Tests

| Source        | DF  | Seq SS   | Adj SS   | Adj MS  | F      | P     |
|---------------|-----|----------|----------|---------|--------|-------|
| Pack          | 1   | 1525.4   | 1525.4   | 1525.4  | 24.95  | 0.000 |
| BHA           | 1   | 0.0      | 0.0      | 0.0     | 0.00   | 1.000 |
| Week          | 6   | 110684.4 | 110684.4 | 18447.4 | 301.75 | 0.000 |
| T             | 2   | 18919.3  | 18919.3  | 9459.6  | 154.73 | 0.000 |
| Pack*BHA      | 1   | 63.0     | 63.0     | 63.0    | 1.03   | 0.311 |
| Pack*Week     | 6   | 1289.9   | 1289.9   | 215.0   | 3.52   | 0.003 |
| Pack*T        | 2   | 3120.1   | 3120.1   | 1560.1  | 25.52  | 0.000 |
| BHA*Week      | 6   | 1606.8   | 1606.8   | 267.8   | 4.38   | 0.000 |
| BHA*T         | 2   | 15.0     | 15.0     | 7.5     | 0.12   | 0.885 |
| Week*T        | 12  | 5706.0   | 5706.0   | 475.5   | 7.78   | 0.000 |
| Pack*BHA*Week | 6   | 1478.4   | 1478.4   | 246.4   | 4.03   | 0.001 |
| Pack*BHA*T    | 2   | 52.1     | 52.1     | 26.0    | 0.43   | 0.654 |
| Pack*Week*T   | 12  | 3753.1   | 3753.1   | 312.8   | 5.12   | 0.000 |
| BHA*Week*T    | 12  | 3670.4   | 3670.4   | 305.9   | 5.00   | 0.000 |
| Error         | 180 | 11004.3  | 11004.3  | 61.1    |        |       |
| Total         | 251 | 162888.1 |          |         |        |       |

146

147 S = 7.81890 R-Sq = 93.24% R-Sq(adj) = 90.58%

148 **Abbreviations:**

149 Pack: Packaging type (P1: type A, PET/PE/MPET (High Barrier)/LLDPE or P2: type B, PET/PE/ALU/LLDPE)

150 BHA: Samples treatment (1: samples without BHA addition, 2: samples with BHA addition)

151 Week: Storage weeks (0, 1, 2, 3, 4, 5, 6, 7, 8, 10, 12, 14, 16, 20 and 24)

152 T: Storage temperature (25, 40 and 60 °C)

153
